# Supplementary material for: Cardiovascular outcomes in adults with migraine treated with eptinezumab for migraine prevention: pooled data from four randomized, double-blind, placebo-controlled studies
Source: PubMed Central journal article supplement (PMC8903619; doi:10.1186/s10194-021-01360-1), 2021-11-25
Supplement: 10194_2021_1360_MOESM1_ESM.pdf [file 10194_2021_1360_MOESM1_ESM.pdf]

1 **TITLE PAGE**

2 **Cardiovascular Outcomes in Adults With Migraine Treated With Eptinezumab for**  
3 **Migraine Prevention: Pooled Data From Four Randomized, Double-Blind, Placebo-**  
4 **Controlled Studies**

5  
6 Timothy R. Smith,<sup>1</sup> Egilius L.H. Spierings,<sup>2</sup> Roger Cady,<sup>3</sup> Joe Hirman,<sup>4</sup> Anders Ettrup,<sup>5</sup>  
7 Vivienne Shen<sup>6</sup>

8  
9 *<sup>1</sup>StudyMetrix Research, Saint Peters, MO, USA; <sup>2</sup>Medvadis Research Corporation, Boston*  
10 *PainCare, Waltham, MA, USA; <sup>3</sup>Lundbeck La Jolla Research Center, San Diego, CA, USA;*  
11 *<sup>4</sup>Pacific Northwest Statistical Consulting, Inc., Woodinville, WA, USA; <sup>5</sup>H. Lundbeck A/S,*  
12 *Copenhagen, Denmark; <sup>6</sup>Lundbeck LLC, Deerfield, IL, USA*

13  
14 **Corresponding Author:**

15 Timothy R. Smith, MD, RPh  
16 StudyMetrix Research, LLC  
17 3862 Mexico Road  
18 St. Peters, MO 63303  
19 Tel: 636.387.5100  
20 Email: [tsmith@studymetrix.com](mailto:tsmith@studymetrix.com)

21  
22  
23  
24

25 **Supplemental Table 1.** Study Drug Discontinuation and Infusion Interruption Due to  
 26 Cardiovascular Treatment-emergent Adverse Events Across the Pooled Eptinezumab Clinical  
 27 Trial Population

|                                   | Eptinezumab<br>100 mg<br>N=701 | Eptinezumab<br>300 mg<br>N=695 | Eptinezumab<br>1000 mg<br>N=81 | Placebo<br>N=791 |
|-----------------------------------|--------------------------------|--------------------------------|--------------------------------|------------------|
| Study drug discontinuation, n (%) |                                |                                |                                |                  |
| <b>Increased blood pressure</b>   | 1 (0.1)                        | 0                              | 0                              | 0                |
| <b>Hypertension</b>               | 1 (0.1)                        | 0                              | 0                              | 0                |
| Infusion interruption, n (%)      | 0                              | 0                              | 0                              | 0                |
| Possibly related, n (%)           | 0                              | 0                              | 0                              | 0                |

28

29 **Supplemental Table 2.** New or Changed Cardiovascular Concomitant Medications Across the  
 30 Pooled Eptinezumab Clinical Trial Population

|                           | Eptinezumab<br>100 mg<br>N=701 | Eptinezumab<br>300 mg<br>N=695 | Eptinezumab<br>1000 mg<br>N=81 | Placebo<br>N=791 |
|---------------------------|--------------------------------|--------------------------------|--------------------------------|------------------|
| Antihypertensives, n (%)* | 18 (2.6)                       | 22 (3.2)                       | 5 (6.2)                        | 18 (2.3)         |
| Antilipidemics, n (%)     | 7 (1.0)                        | 5 (0.7)                        | 2 (2.5)                        | 3 (0.4)          |
| Antianginals, n (%)       | 0                              | 1 (0.1)                        | 1 (1.2)                        | 1 (0.1)          |

31 \*Antihypertensives: amlodipine, atenolol, benazepril, betaxolol hydrochloride, candesartan, candesartan cilexetil,  
 32 captopril, clonidine, clonidine hydrochloride, diltiazem hydrochloride, enalapril, hydrochlorothiazide, hyzaar,  
 33 lisinopril, losartan, losartan potassium, metoprolol, metoprolol tartrate, nadolol, nicardipine hydrochloride, prazosin,  
 34 prazosin hydrochloride, propranolol, rilmenidine, spironolactone, timolol, trandolapril, verapamil, verapamil  
 35 hydrochloride, zestoretic.

36 \*\*Antilipidemics: atorvastatin, atorvastatin calcium, cholestyramine, fish oil, pravastatin, rosuvastatin, simvastatin.

37 \*\*\*Antianginals: glyceryl trinitrate.

38
